# Supplementary material
Source: publisher site journal article supplement (https://www.oncotarget.com/article/28289)
Supplement: Supplementary file 1 [file 28289]

## Addendum

**Addendum: Significant efficacy and well safety of apatinib in an advanced liver cancer patient: a case report and literature review****Peisi Kou<sup>1,2,\*</sup>, Yan Zhang<sup>2,\*</sup>, Wenbo Shao<sup>4</sup>, Hui Zhu<sup>2</sup>, Jingze Zhang<sup>2</sup>, Haiyong Wang<sup>2</sup>, Li Kong<sup>2</sup> and Jinming Yu<sup>2,3,1</sup>**<sup>1</sup>Department of Radiation Oncology, The First Affiliated Hospital of Zhengzhou University, Zhengzhou, China<sup>2</sup>Department of Radiation Oncology, Shandong Cancer Hospital Affiliated to Shandong University, Jinan, China<sup>3</sup>School of Medicine and Life Sciences, University of Jinan - Shandong Academy of Medical Sciences, Jinan, China<sup>4</sup>Department of Intervention, Shandong Cancer Hospital Affiliated to Shandong University, Jinan, China

\*These authors have contributed equally to this work

**Published:****Copyright:** © 2022 Kou et al. This is an open access article distributed under the terms of the [Creative Commons Attribution License](#) (CC BY 3.0), which permits unrestricted use, distribution, and reproduction in any medium, provided the original author and source are credited.**Consent was added to this article:** The patient provided written informed consent.Original article: Oncotarget. 2017; 8:20510–20515. <https://doi.org/10.18632/oncotarget.14724>
